# Supplementary material for: Stress responses, M2 macrophages, and a distinct microbial signature in fatal intestinal acute graft-versus-host disease
Source: JCI journal article supplement (doi:10.1172/jci.insight.129762), 2019-08-08

**Supplemental Figure 1.** Programmed death ligand-1 staining by immunohistochemistry on a colon biopsy from a patient with acute graft-versus-host disease, normal colon, and lung carcinoma.

Supplemental Figure 1

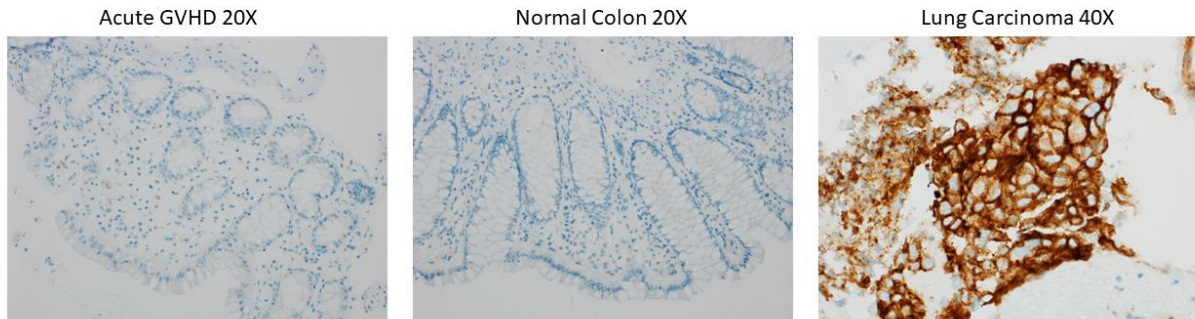

**Supplemental Figure 2.** Cell signaling processes at the onset of acute graft-versus-host disease associated early mortality.

Supplemental Figure 2

Cell signaling processes at the onset of acute GVHD associated early mortality

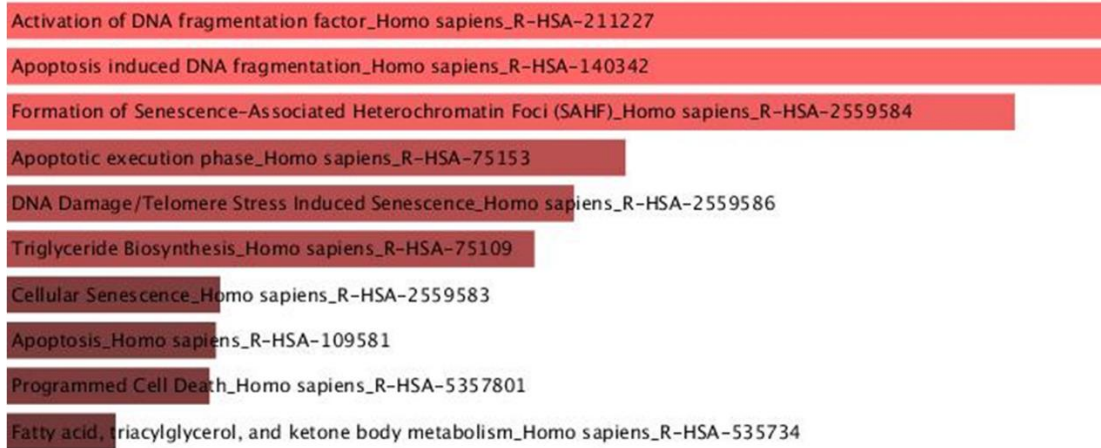

**Supplemental Figure 3.** Cell signaling processes at the onset of acute graft-versus-host disease associated prolonged survival.

Supplemental Figure 3

Cell signaling processes at the onset of acute GVHD associated longer survival

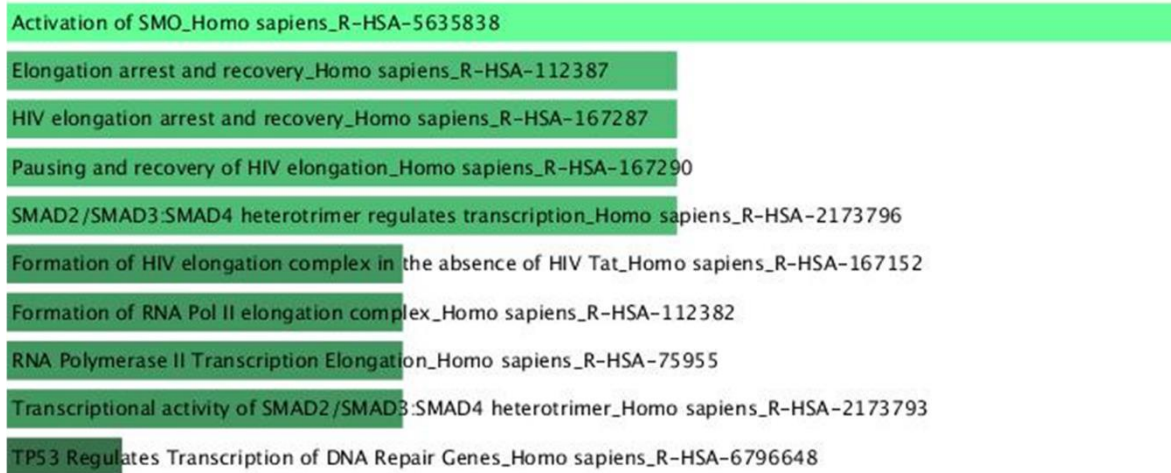

Supplement: sd1 [file 1]
